# Supplementary material for: Heterogeneity of G protein activation by the calcium-sensing receptor
Source: J Mol Endocrinol. 2021 Jun 2;67(2):41–53. doi: 10.1530/JME-21-0058 (PMC8240730; doi:10.1530/JME-21-0058)
Supplement: Supplementary Table 2 Statistical analyses comparing % maximal suppression of baseline for NanoBiT dissociation assays [file supplementary_table_2.pdf]

**Supplementary Table 2      Statistical analyses comparing % maximal suppression of baseline for NanoBiT dissociation assays**

| Gq/i1 family   |         |                 |                | Gi/o family     |                |                 |                | G12/13 family   |         |
|----------------|---------|-----------------|----------------|-----------------|----------------|-----------------|----------------|-----------------|---------|
| Gq             | p-value | G11             | p-value        | Gi1             | p-value        | Gi3             | p-value        | G12             | p-value |
| b1 q vs. b4 i5 | *       | b3 i1 vs. b2 z  | **             | b1 i1 vs. b2 z  | **             | b1 i3 vs. b4 i3 | **             | b1 i2 vs. b2 i2 | *       |
| b1 q vs. b1 i2 | **      | b3 i1 vs. b2 i2 | *              | b1 i1 vs. b2 i2 | *              | b1 i3 vs. b5 o  | *              | b1 i2 vs. b2 i3 | *       |
| b1 q vs. b3 i2 | **      | b3 i1 vs. b2 i3 | *              | b1 i1 vs. b2 i3 | *              |                 |                | b1 i2 vs. b4 i3 | *       |
| b1 q vs. b1 i3 | **      | b3 i1 vs. b4 i3 | **             | b1 i1 vs. b4 i3 | *              | b2 i3 vs. b4 i3 | *              |                 |         |
| b1 q vs. b2 i3 | **      |                 |                |                 |                | b2 i3 vs. b5 o  | *              |                 |         |
| b1 q vs. b1 z  | ***     | b4 i1 vs. b2 z  | **             | b2 i1 vs. b2 z  | *              |                 |                |                 |         |
| b1 q vs. b2 z  | ****    | b4 i1 vs. b2 i2 | *              | b2 i1 vs. b4 i3 | *              | b4 i3 vs. b1 z  | **             |                 |         |
| b1 q vs. b3 z  | *       | b4 i1 vs. b2 i3 | *              |                 |                | b4 i3 vs. b2 z  | ****           |                 |         |
| b1 q vs. b4 z  | ***     | b4 i1 vs. b4 i3 | **             | b3 i1 vs. b1 z  | *              | b4 i3 vs. b3 z  | *              |                 |         |
| b1 q vs. b2 i2 | ****    |                 |                | b3 i1 vs. b2 z  | ***            | b4 i3 vs. b4 z  | **             |                 |         |
| b1 q vs. b3 i2 | **      | <b>G14</b>      | <b>p-value</b> | b3 i1 vs. b4 z  | *              | b4 i3 vs. b2 i2 | ****           |                 |         |
| b1 q vs. b2 i3 | ****    | b1 i4 vs. b2 z  | *              | b3 i1 vs. b2 i2 | **             | b4 i3 vs. b3 i2 | **             |                 |         |
| b1 q vs. b4 i3 | ****    | b1 i4 vs. b2 i2 | *              | b3 i1 vs. b2 i3 | **             | b4 i3 vs. b2 i3 | ****           |                 |         |
| b1 q vs. b2 s  | *       | b1 i4 vs. b4 i3 | *              | b3 i1 vs. b4 i3 | ***            | b4 i3 vs. b4 i3 | ****           |                 |         |
| b1 q vs. b3 s  | **      |                 |                |                 |                | b4 i3 vs. b3 s  | **             |                 |         |
|                |         | b2 i4 vs. b2 z  | *              | b4 i1 vs. b1 i2 | *              |                 |                |                 |         |
| b2 q vs. b1 z  | *       |                 |                | b4 i1 vs. b1 i3 | *              | <b>Go</b>       | <b>p-value</b> |                 |         |
| b2 q vs. b2 z  | ***     | <b>G15</b>      | <b>p-value</b> | b4 i1 vs. b1 z  | *              | b1 o vs. b1 z   | *              |                 |         |
| b2 q vs. b4 z  | *       | b2 i5 vs. b2 z  | **             | b4 i1 vs. b2 z  | ****           | b1 o vs. b2 z   | ***            |                 |         |
| b2 q vs. b2 i2 | **      | b2 i5 vs. b2 i2 | *              | b4 i1 vs. b4 z  | **             | b1 o vs. b4 z   | *              |                 |         |
| b2 q vs. b2 i3 | **      | b2 i5 vs. b2 i3 | *              | b4 i1 vs. b2 i2 | ***            | b1 o vs. b2 i2  | **             |                 |         |
| b2 q vs. b4 i3 | ***     | b2 i5 vs. b4 i3 | *              | b4 i1 vs. b2 i3 | ***            | b1 o vs. b2 i3  | **             |                 |         |
| b2 q vs. b3 s  | *       |                 |                | b4 i1 vs. b4 i3 | ***            | b1 o vs. b4 i3  | **             |                 |         |
|                |         | b3 i5 vs. b2 z  | *              | b4 i1 vs. b3 s  | *              | b1 o vs. b3 s   | *              |                 |         |
| b3 q vs. b2 i1 | *       | b3 i5 vs. b2 i2 | *              | b5 i1 vs. b1 i2 | **             | b2 o vs. b2 z   | *              |                 |         |
| b3 q vs. b3 i4 | *       | b3 i5 vs. b4 i3 | *              | b5 i1 vs. b3 i2 | **             |                 |                |                 |         |
| b3 q vs. b1 i5 | *       |                 |                | b5 i1 vs. b1 i3 | **             | b3 o vs. b2 z   | ***            |                 |         |
| b3 q vs. b4 i5 | **      | b4 i5 vs. b5 i5 | **             | b5 i1 vs. b2 i3 | **             | b3 o vs. b4 z   | *              |                 |         |
| b3 q vs. b1 i2 | ***     | b4 i5 vs. b5 i1 | *              | b5 i1 vs. b1 z  | ***            | b3 o vs. b2 i2  | **             |                 |         |
| b3 q vs. b3 i2 | ***     | b4 i5 vs. b4 i3 | *              | b5 i1 vs. b2 z  | ****           | b3 o vs. b2 i3  | **             |                 |         |
| b3 q vs. b4 i2 | *       | b4 i5 vs. b5 o  | *              | b5 i1 vs. b3 z  | **             | b3 o vs. b4 i3  | **             |                 |         |
| b3 q vs. b1 i3 | ***     |                 |                | b5 i1 vs. b4 z  | ***            |                 |                |                 |         |
| b3 q vs. b2 i3 | ***     | b5 i5 vs. b1 i2 | ***            | b5 i1 vs. b2 i2 | ****           | b5 o vs. b1 z   | **             |                 |         |
| b3 q vs. b3 i3 | *       | b5 i5 vs. b3 i2 | **             | b5 i1 vs. b3 i2 | **             | b5 o vs. b2 z   | ****           |                 |         |
| b3 q vs. b4 o  | *       | b5 i5 vs. b1 i3 | ***            | b5 i1 vs. b2 i3 | ****           | b5 o vs. b3 z   | *              |                 |         |
| b3 q vs. b1 z  | ****    | b5 i5 vs. b2 i3 | **             | b5 i1 vs. b4 i3 | ****           | b5 o vs. b4 z   | **             |                 |         |
| b3 q vs. b2 z  | ****    | b5 i5 vs. b1 z  | ***            | b5 i1 vs. b2 s  | *              | b5 o vs. b2 i2  | ***            |                 |         |
| b3 q vs. b3 z  | ***     | b5 i5 vs. b2 z  | ****           | b5 i1 vs. b3 s  | ***            | b5 o vs. b3 i2  | *              |                 |         |
| b3 q vs. b4 z  | ****    | b5 i5 vs. b3 z  | **             |                 |                | b5 o vs. b2 i3  | ***            |                 |         |
| b3 q vs. b2 i2 | ****    | b5 i5 vs. b4 z  | ***            | <b>Gi2</b>      | <b>p-value</b> | b5 o vs. b4 i3  | ***            |                 |         |
| b3 q vs. b3 i2 | ***     | b5 i5 vs. b2 i2 | ****           | b1 i2 vs. b4 i3 | **             | b5 o vs. b3 s   | **             |                 |         |
| b3 q vs. b2 i3 | ****    | b5 i5 vs. b3 i2 | **             | b1 i2 vs. b5 o  | *              |                 |                |                 |         |
| b3 q vs. b4 i3 | ****    | b5 i5 vs. b2 i3 | ****           |                 |                | <b>Gz</b>       | <b>p-value</b> |                 |         |
| b3 q vs. b2 s  | **      | b5 i5 vs. b4 i3 | ****           | b2 i2 vs. b2 z  | *              | b2 z vs. b1 i2  | **             |                 |         |
| b3 q vs. b3 s  | ****    | b5 i5 vs. b2 s  | **             |                 |                |                 |                |                 |         |
|                |         | b5 i5 vs. b3 s  | ***            | b3 i2 vs. b4 i3 | **             |                 |                |                 |         |
|                |         |                 |                | b3 i2 vs. b5 o  | *              |                 |                |                 |         |

Analyses were performed in Graphpad using one-way ANOVA. Only comparisons that were significantly different are shown in the table.
