# Supplementary material for: Heterogeneity of G protein activation by the calcium-sensing receptor
Source: PubMed Central journal article supplement (PMC8240730; doi:10.1530/jme-21-0058), 2021-06-02

**A**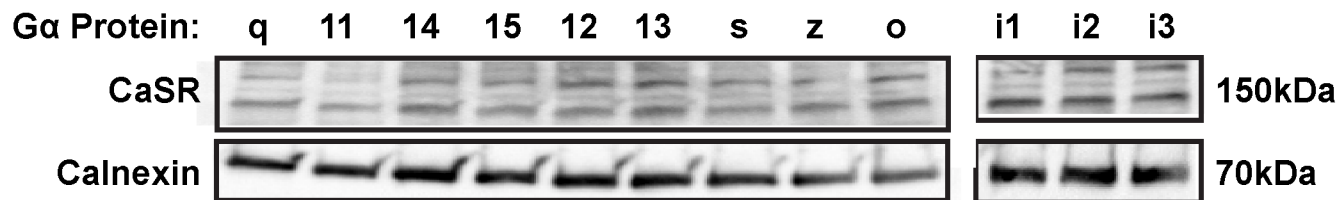**B**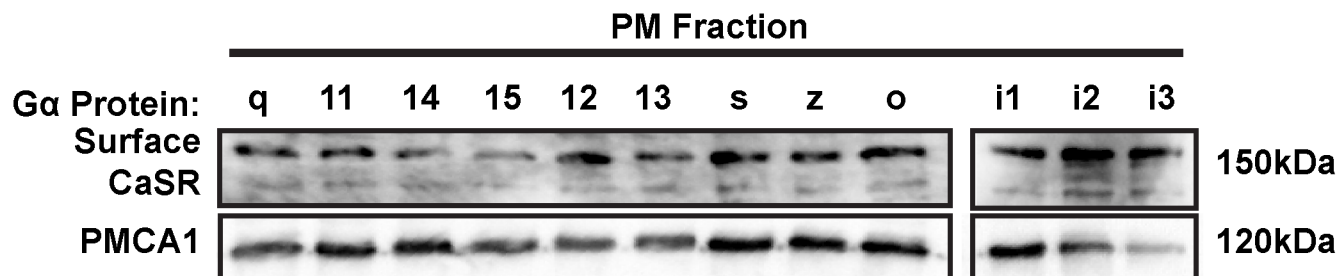**C**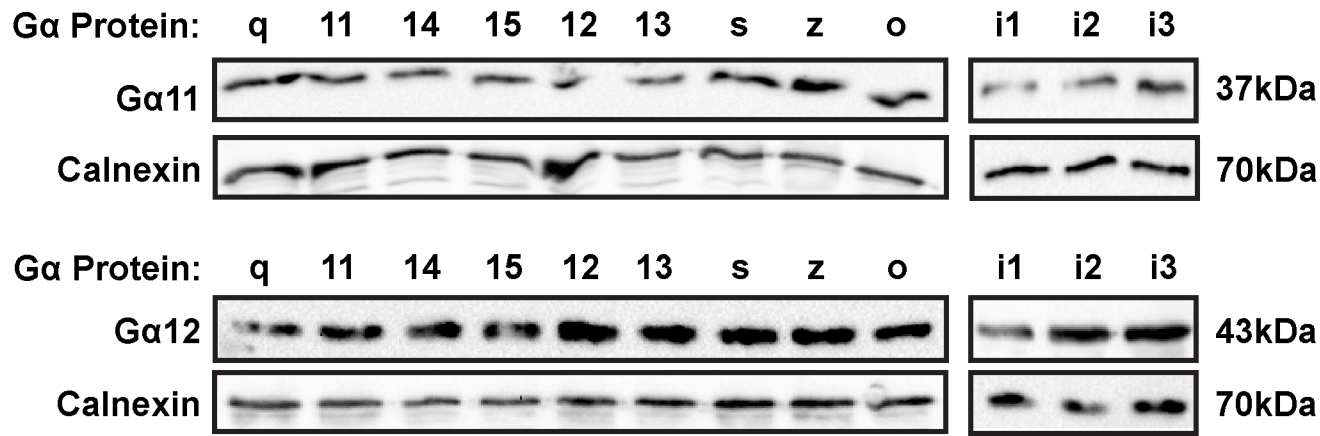

Supplement: supplementary_figure_6.pdf [file supplementary_figure_6.pdf]
