# Supplementary material for: Heterogeneity of G protein activation by the calcium-sensing receptor
Source: PubMed Central journal article supplement (PMC8240730; doi:10.1530/jme-21-0058), 2021-06-02
Supplement: supplementary_figure_10.pdf [file supplementary_figure_10.pdf]

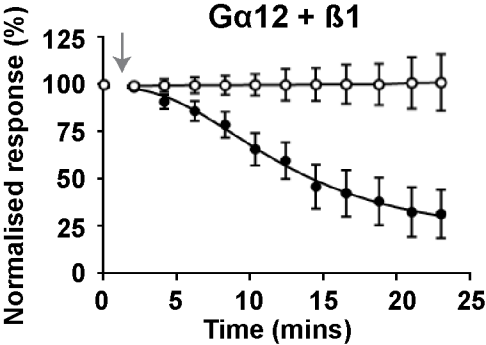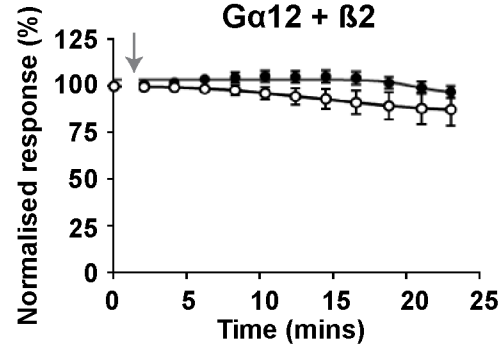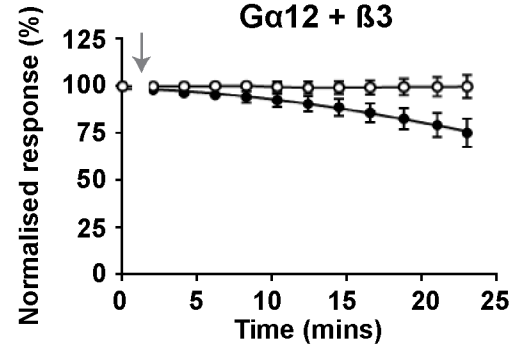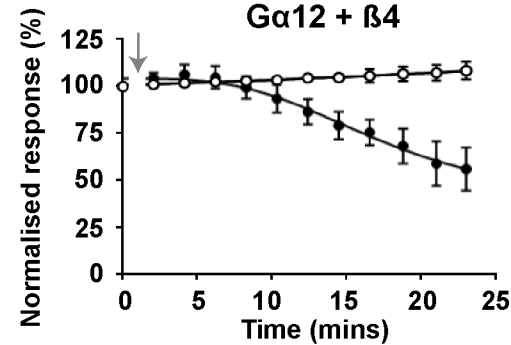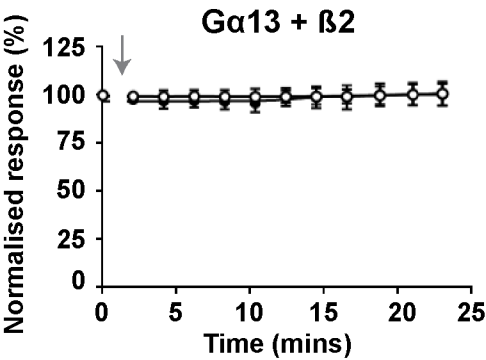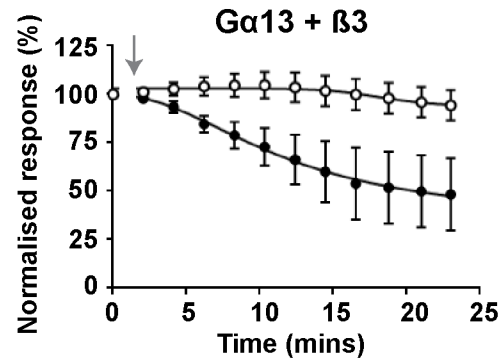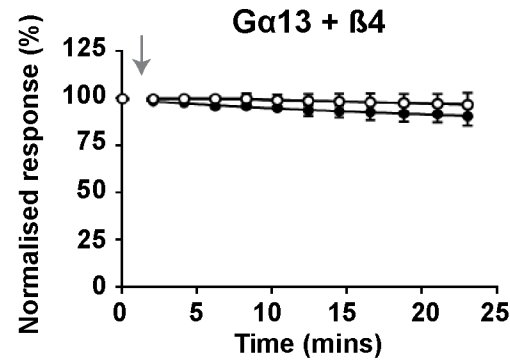

[CaCl<sub>2</sub>] mM

○ 0.1

● 5
