# Supplementary material for: Heterogeneity of G protein activation by the calcium-sensing receptor
Source: PubMed Central journal article supplement (PMC8240730; doi:10.1530/jme-21-0058), 2021-06-02
Supplement: supplementary_table_1.pdf [file supplementary_table_1.pdf]

**Supplementary Table 1**  
**NanoBiT analyses**

**Relative luminescence units for  $G\alpha$ - $G\beta\gamma$  pairings used in**

| <b><math>G\alpha</math></b> | <b><math>\beta 1</math><br/>mean<br/><math>\pm</math> SEM</b> | <b><math>\beta 2</math><br/>mean<br/><math>\pm</math> SEM</b> | <b><math>\beta 3</math><br/>mean<br/><math>\pm</math> SEM</b> | <b><math>\beta 4</math><br/>mean<br/><math>\pm</math> SEM</b> | <b><math>\beta 5</math><br/>mean<br/><math>\pm</math> SEM</b> |
|-----------------------------|---------------------------------------------------------------|---------------------------------------------------------------|---------------------------------------------------------------|---------------------------------------------------------------|---------------------------------------------------------------|
|                             | 1429843<br>$\pm$ 9681                                         | 1538596.13<br>$\pm$ 20637                                     | 1517952.5<br>$\pm$ 14689                                      | 1477760<br>$\pm$ 102008                                       | 14368.75<br>$\pm$ 3279                                        |
| <b>i1</b>                   | 13961.81<br>$\pm$ 1900                                        | 343928.69<br>$\pm$ 81589                                      | 436015.69<br>$\pm$ 65129                                      | 66027.94<br>$\pm$ 20803                                       | 3243.5<br>$\pm$ 533                                           |
| <b>i2</b>                   | 29376.88<br>$\pm$ 4080                                        | 439990.38<br>$\pm$ 10326                                      | 486706.38<br>$\pm$ 76539                                      | 31343.25<br>$\pm$ 19999                                       | <1000                                                         |
| <b>i3</b>                   | 255533.19<br>$\pm$ 6709                                       | 1467052.88<br>$\pm$ 21648                                     | 1640812.5<br>$\pm$ 95518                                      | 1579270.79<br>$\pm$ 143680                                    | <1000                                                         |
| <b>o</b>                    | 80423.88<br>$\pm$ 1977                                        | 224591.42<br>$\pm$ 77462                                      | 107235.75<br>$\pm$ 17669                                      | 78888.81<br>$\pm$ 13498                                       | 1769.38<br>$\pm$ 151                                          |
| <b>s</b>                    | 3465<br>$\pm$ 649                                             | 149008.88<br>$\pm$ 57452                                      | 205348.08<br>$\pm$ 15159                                      | 105112.33<br>$\pm$ 45407                                      | <1000                                                         |
| <b>z</b>                    | 12416<br>$\pm$ 1846                                           | 95445.25<br>$\pm$ 17662                                       | 22129.44<br>$\pm$ 4918                                        | 34965.75<br>$\pm$ 8176                                        | <1000                                                         |
| <b>q</b>                    | 1624<br>$\pm$ 163                                             | 207794.61<br>$\pm$ 86590                                      | 65921.75<br>$\pm$ 8932                                        | 21793.71<br>$\pm$ 1510                                        | <1000                                                         |
| <b>11</b>                   | 1734.06<br>$\pm$ 72.47                                        | 164404.25<br>$\pm$ 79632                                      | 73417.06<br>$\pm$ 3417                                        | 13272.8<br>$\pm$ 4091                                         | <1000                                                         |
| <b>12</b>                   | 1360.38<br>$\pm$ 67.33                                        | 146960.06<br>$\pm$ 69571                                      | 149904.63<br>$\pm$ 13198                                      | 63529.92<br>$\pm$ 11665                                       | <1000                                                         |
| <b>13</b>                   | 4260.06<br>$\pm$ 1523                                         | 255160.71<br>$\pm$ 108754                                     | 179421<br>$\pm$ 20788                                         | 126477.06<br>$\pm$ 37195                                      | <1000                                                         |
| <b>14</b>                   | 1423.44<br>$\pm$ 141                                          | 349389.14<br>$\pm$ 13756                                      | 151675.5<br>$\pm$ 11980                                       | 43598.13<br>$\pm$ 11545                                       | 2224<br>$\pm$ 499                                             |
| <b>15</b>                   |                                                               |                                                               |                                                               |                                                               |                                                               |

Expression of LgBiT- $G\alpha$  with empty SmBiT and LgBiT empty with SmBiT- $G\beta$  had <1000 relative luminescence units.
