# Supplementary material for: Heterogeneity of G protein activation by the calcium-sensing receptor
Source: PubMed Central journal article supplement (PMC8240730; doi:10.1530/jme-21-0058), 2021-06-02
Supplement: supplementary_table_3.pdf [file supplementary_table_3.pdf]

Supplementary Table 3

Statistical analyses comparing expression of G-protein  $\alpha$ -subunits in human parathyroid tissue

|              | <i>GNAQ</i> | <i>GNAI1</i> | <i>GNAI4</i> | <i>GNAI5</i> | <i>GNAI2</i> | <i>GNAI3</i> | <i>GNAS1</i> | <i>GNAL</i> | <i>GNAI1</i> | <i>GNAI2</i> | <i>GNAI3</i> | <i>GNAO1</i> | <i>GNAZ</i> |
|--------------|-------------|--------------|--------------|--------------|--------------|--------------|--------------|-------------|--------------|--------------|--------------|--------------|-------------|
| <i>GNAQ</i>  |             | **           | NS           | **           | NS           | NS           | NS           | NS          | NS           | NS           | NS           | ****         | NS          |
| <i>GNAI1</i> |             |              | ***          | ****         | *            | NS           | *            | *           | NS           | *            | *            | ****         | NS          |
| <i>GNAI4</i> |             |              |              | NS           | NS           | NS           | NS           | NS          | NS           | NS           | NS           | **           | *           |
| <i>GNAI5</i> |             |              |              |              | *            | **           | *            | *           | ***          | NS           | *            | *            | ****        |
| <i>GNAI2</i> |             |              |              |              |              | NS           | NS           | NS          | NS           | NS           | NS           | **           | NS          |
| <i>GNAI3</i> |             |              |              |              |              |              | NS           | NS          | NS           | NS           | NS           | ***          | NS          |
| <i>GNAS1</i> |             |              |              |              |              |              |              | NS          | NS           | NS           | NS           | *            | NS          |
| <i>GNAL</i>  |             |              |              |              |              |              |              |             | NS           | NS           | NS           | *            | NS          |
| <i>GNAI1</i> |             |              |              |              |              |              |              |             |              | NS           | NS           | ****         | NS          |
| <i>GNAI2</i> |             |              |              |              |              |              |              |             |              |              | NS           | **           | NS          |
| <i>GNAI3</i> |             |              |              |              |              |              |              |             |              |              |              | ***          | NS          |
| <i>GNAO1</i> |             |              |              |              |              |              |              |             |              |              |              |              | ****        |
| <i>GNAZ</i>  |             |              |              |              |              |              |              |             |              |              |              |              |             |

Statistical analyses of data shown in Figure 4A. Analyses were performed by one-way ANOVA. \*\*\*\*p<0.0001, \*\*\*p<0.001, \*\*p<0.01, \*p<0.05, NS – not significant.
